# Supplementary material for: Palladium(ii) and platinum(ii) complexes with ONN donor pincer ligand: synthesis, characterization and in vitro cytotoxicity study
Source: Royal Society of Chemistry journal article supplement (doi:10.1039/d2nj01894b), 2022-01-01
Supplement: d2nj01894b1.pdf [file d2nj01894b1.pdf]

## *Supporting Information*

### **Palladium(II) and platinum(II) complexes with ONN donor pincer ligand: Synthesis, characterization and in vitro cytotoxicity study**

Biswajit Bera,<sup>a</sup> Sanchaita Mondal,<sup>b</sup> Saswati Gharami,<sup>a</sup> Rahul Naskar,<sup>a</sup> Krishna Das Saha<sup>\*b</sup> and Tapan K. Mondal<sup>\*a</sup>

<sup>a</sup>Department of Chemistry, Jadavpur University, Kolkata- 700032, India.

<sup>b</sup>Cancer Biology & Inflammatory Disorder Division, CSIR-Indian Institute of Chemical Biology, Kolkata – 700 032, India

### **CONTENTS**

Fig. S1: <sup>1</sup>H-NMR spectrum of [Pd(HL)Cl<sub>2</sub>] (**C1**) in CDCl<sub>3</sub>

Fig. S2: <sup>1</sup>H-NMR spectrum of [Pt(L)Cl] (**C2**) in CDCl<sub>3</sub>

Fig. S3: Coupling between H1 and H4, between H<sub>a</sub> and H<sub>b</sub> and diastereotopic hydrogens (H<sub>c</sub>, H<sub>c</sub><sup>'</sup>, H<sub>d</sub>, H<sub>d</sub><sup>'</sup> and H<sub>d</sub><sup>''</sup>) in **C1**

Fig. S4: <sup>1</sup>H-<sup>1</sup>H-2D COSY NMR spectrum of **C1** in CDCl<sub>3</sub>

Fig. S5: Coupling between H1 and H4, between H<sub>a</sub> and H<sub>b</sub> and diastereotopic hydrogens (H<sub>c</sub>, H<sub>c</sub><sup>'</sup>, H<sub>d</sub>, H<sub>d</sub><sup>'</sup> and H<sub>d</sub><sup>''</sup>) in **C2**

Fig. S6: <sup>1</sup>H-<sup>1</sup>H-2D COSY NMR spectrum of **C2** in CDCl<sub>3</sub>

Fig. S7: HRMS of [Pd(HL)Cl<sub>2</sub>] (**C1**) in acetonitrile

Fig. S8: HRMS of [Pt(L)Cl] (**C2**) in acetonitrile

Fig. S9: IR spectrum of free HL ligand

Fig. S10: IR spectrum of **C1** complex

Fig. S11: IR spectrum of **C2** complex

Table S1: Crystallographic data and refinement parameters of **C1** and **C2**

Table S2: Selected X-ray and calculated bond distances (Å) and angles (°) of **C1** and **C2**

Table S3: Energy and % of composition of some selected molecular orbitals of [Pd(HL)Cl<sub>2</sub>] (**C1**)

Table S4: Energy and % of composition of some selected molecular orbitals of [Pt(L)Cl] (**C2**)

Table S5: Vertical electronic transition calculated by TDDFT/CPCM method of **C1** and **C2**

Fig. S12: Contour plots of some selected molecular orbital of **C1**

Fig. S13: Contour plots of some selected molecular orbital of **C2**

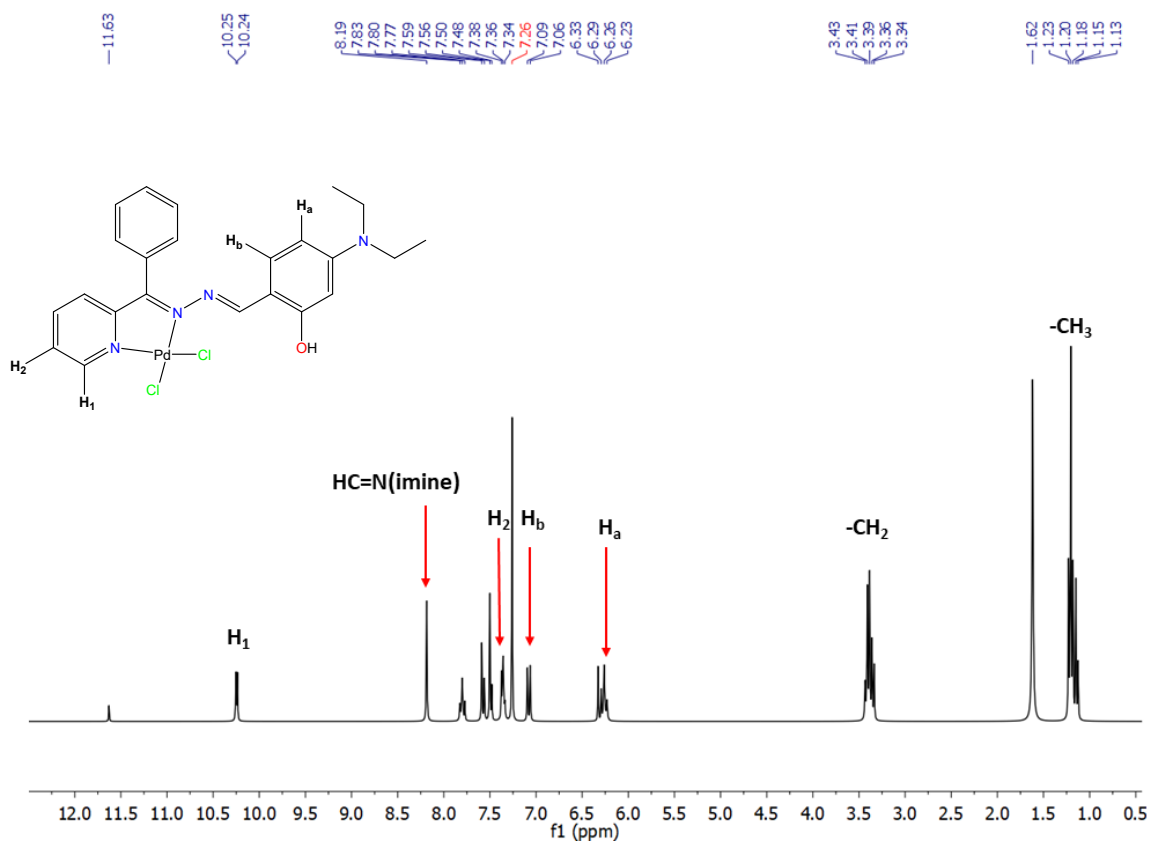

Figure S1:  $^1H$ -NMR spectrum of  $[Pd(HL)Cl_2]$  (C1) in  $CDCl_3$

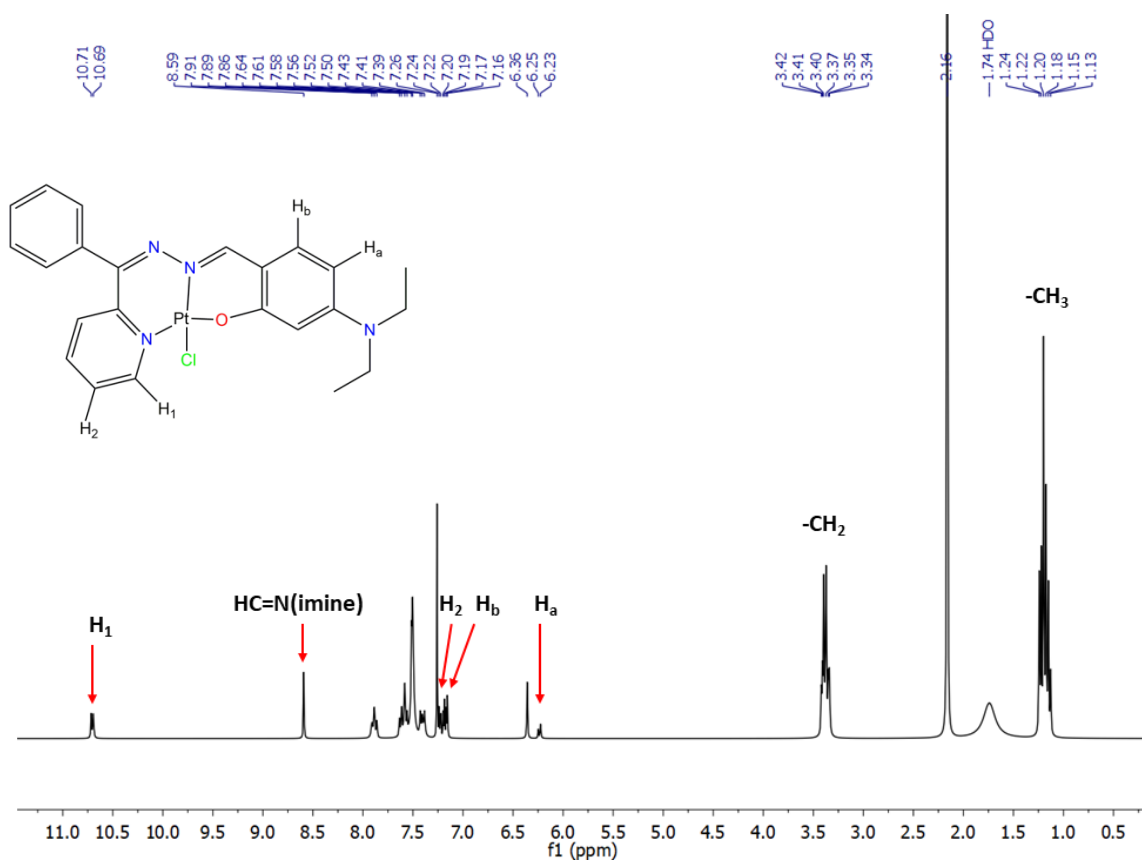

Figure S2:  $^1H$ -NMR spectrum of  $[Pt(L)Cl]$  (C2) in  $CDCl_3$

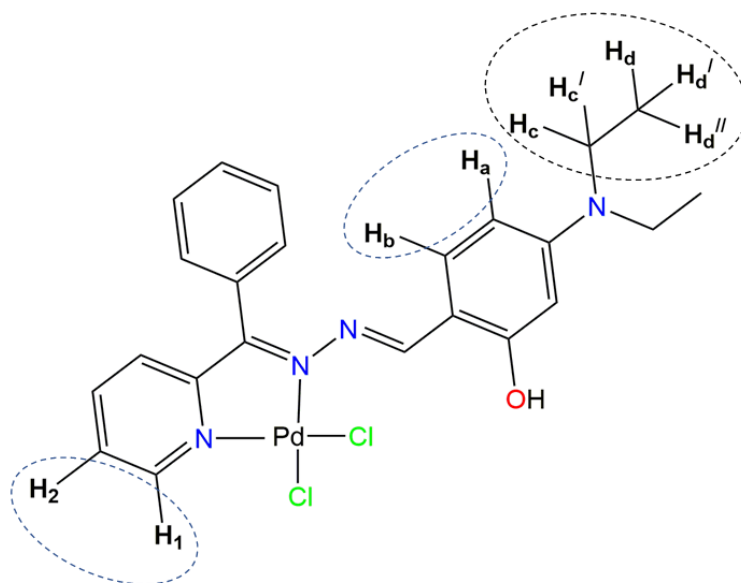

**Figure S3:** Coupling between H1 and H4, between H<sub>a</sub> and H<sub>b</sub> and diastereotopic hydrogens (H<sub>c</sub>, H<sub>c</sub>', H<sub>d</sub>, H<sub>d</sub>' and H<sub>d</sub>'') in C1

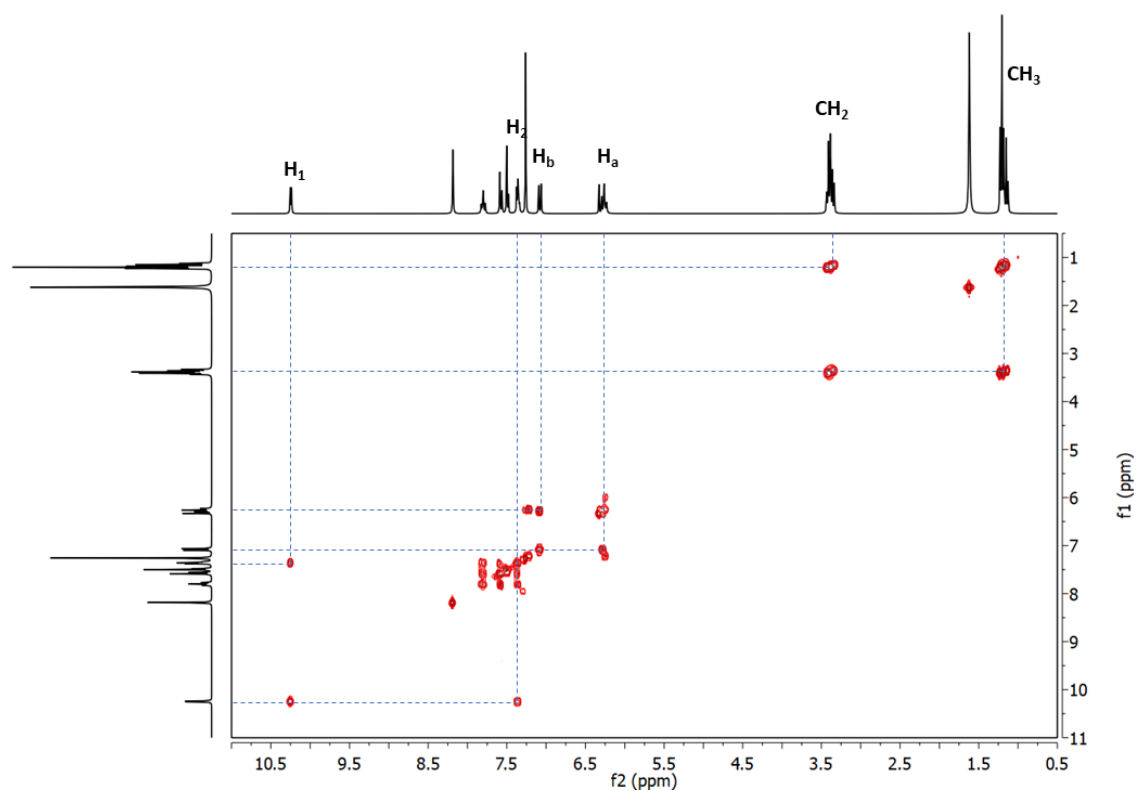

**Figure S4:** <sup>1</sup>H-<sup>1</sup>H-2D COSY NMR spectrum of C1 in CDCl<sub>3</sub>

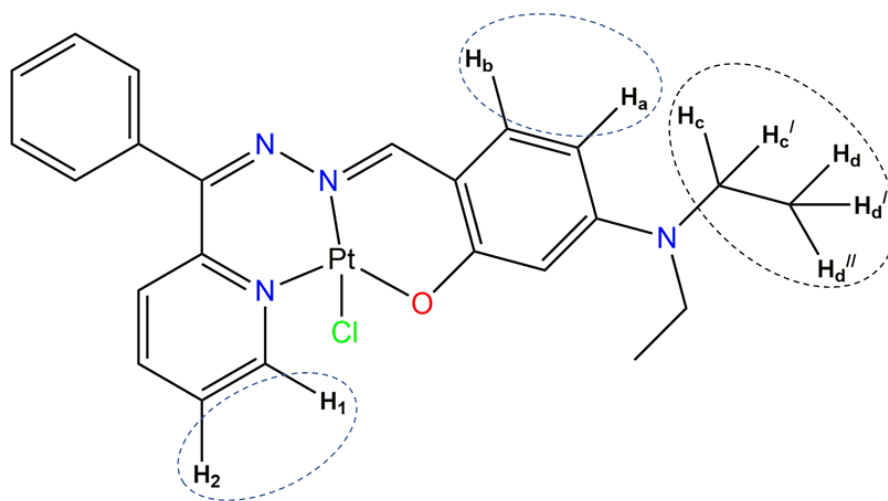

**Figure S5:** Coupling between H1 and H4, between H<sub>a</sub> and H<sub>b</sub> and diastereotopic hydrogens (H<sub>c</sub>, H<sub>c'</sub>, H<sub>d</sub>, H<sub>d'</sub> and H<sub>d''</sub>) in C2

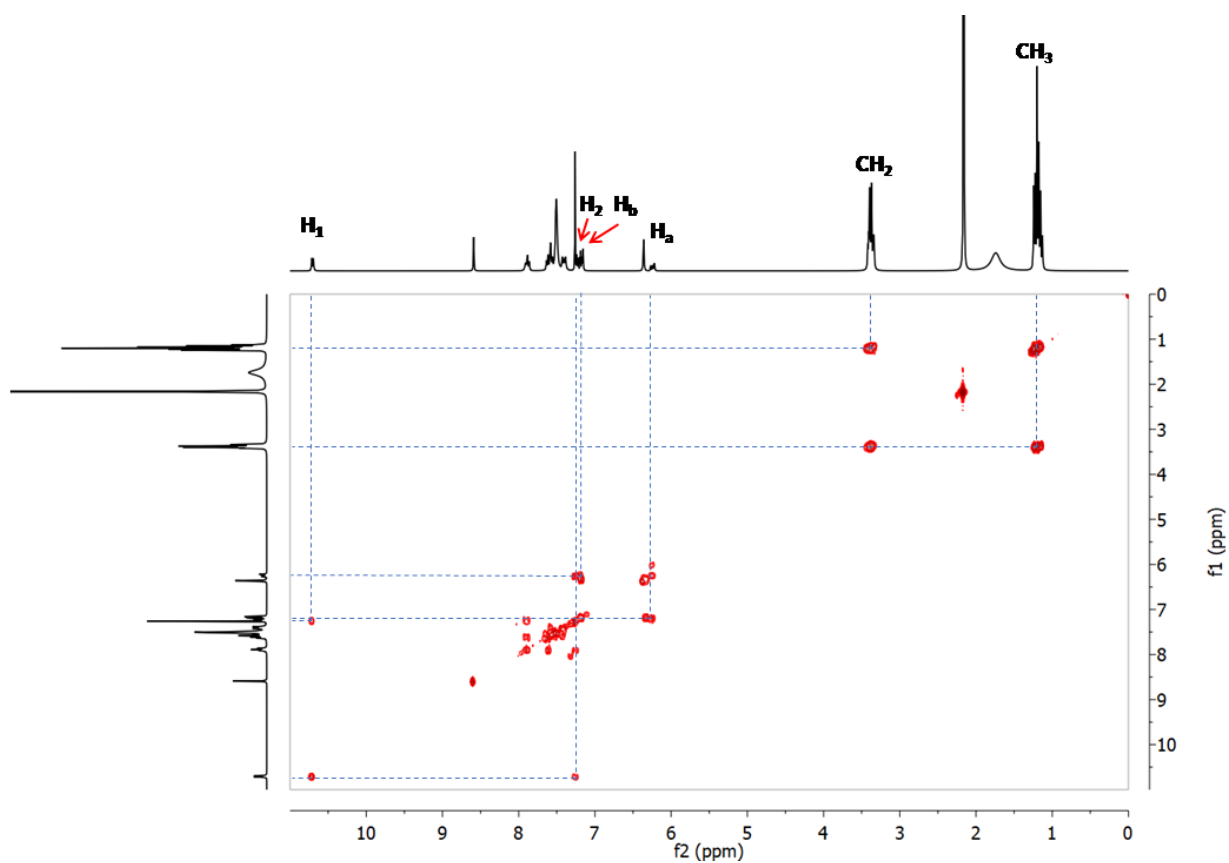

**Figure S6:** <sup>1</sup>H-<sup>1</sup>H-2D COSY NMR spectrum of C2 in CDCl<sub>3</sub>

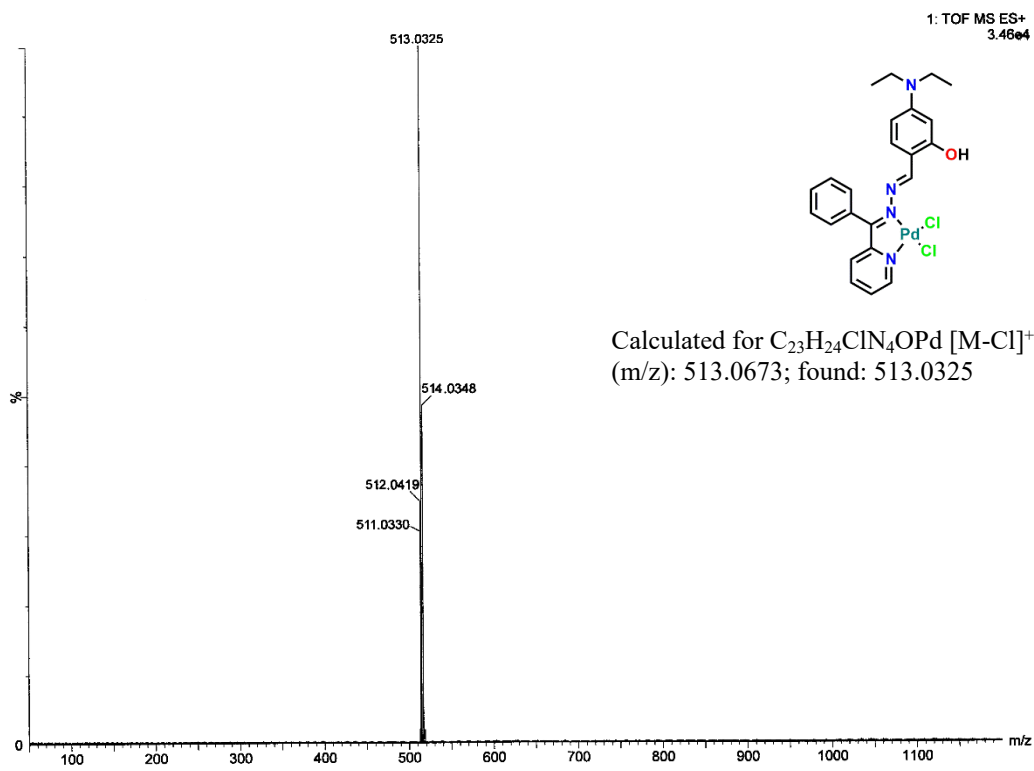

**Figure S7:** HRMS of  $[Pd(HL)Cl_2]$  (C1) in acetonitrile

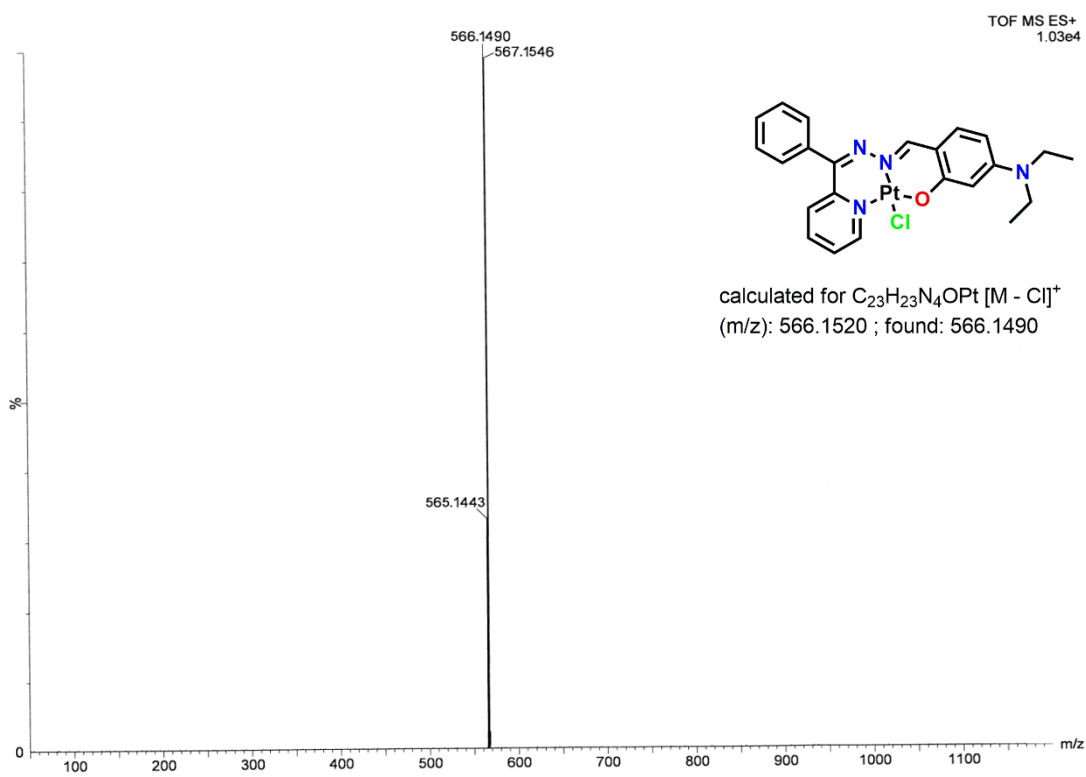

**Figure S8:** HRMS of  $[Pt(L)Cl]$  (C2) in acetonitrile

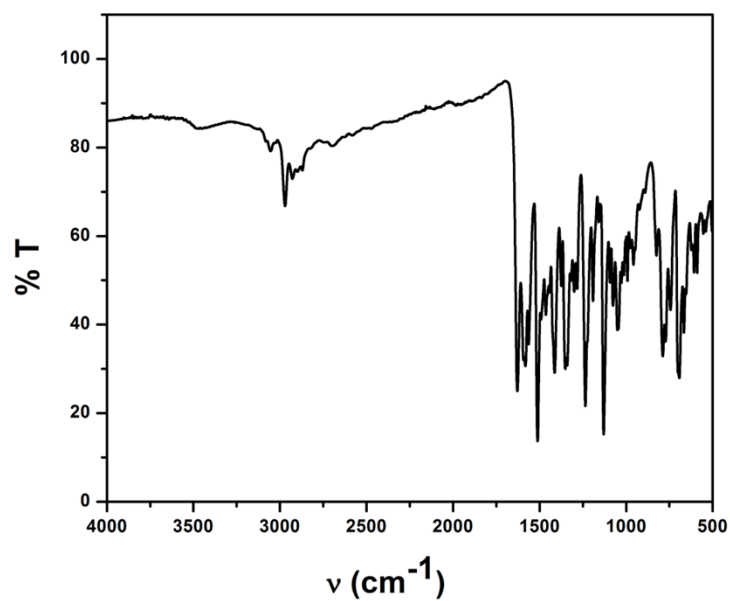

**Figure S9:** IR spectrum of free HL ligand

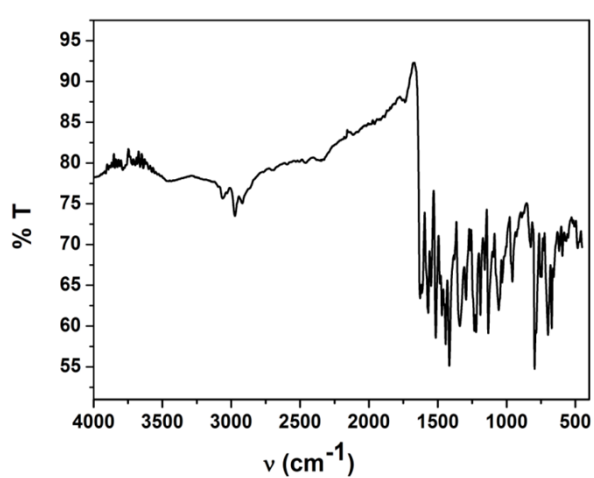

**Figure S10:** IR spectrum of C1 complex

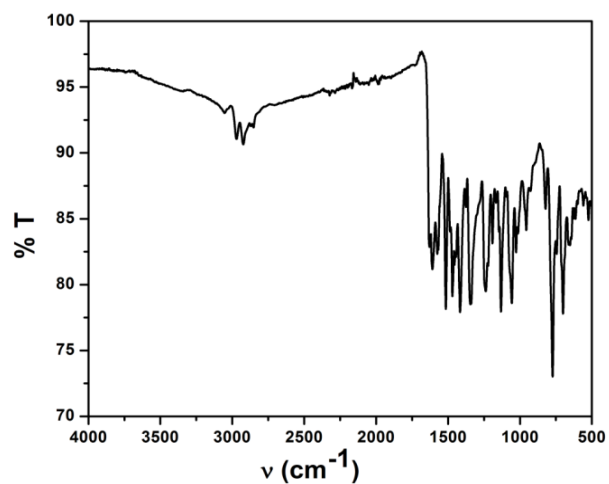

**Figure S11:** IR spectrum of C2 complex

**Table S1.** Crystallographic data and refinement parameters of [Pd(HL)Cl<sub>2</sub>] (C1) and [Pt(L)Cl] (C2)

| Complex                      | [Pd(HL)Cl <sub>2</sub> ] (C1)                                      | [Pt(L)Cl] (C2)                                       |
|------------------------------|--------------------------------------------------------------------|------------------------------------------------------|
| Formula                      | C <sub>23</sub> H <sub>24</sub> Cl <sub>2</sub> N <sub>4</sub> OPd | C <sub>23</sub> H <sub>23</sub> ClN <sub>4</sub> OPt |
| Formula Weight               | 549.76                                                             | 601.99                                               |
| Crystal System               | <i>Triclinic</i>                                                   | <i>Triclinic</i>                                     |
| Space group                  | <i>P - I</i>                                                       | <i>P - I</i>                                         |
| a, b, c [Å]                  | 9.2645(16), 10.3915(18), 24.989(4)                                 | 8.3273(7), 10.4097(8), 13.1711(11)                   |
| α                            | 80.629(4)                                                          | 76.354(3)                                            |
| β                            | 84.019(4)                                                          | 79.382(3)                                            |
| γ                            | 79.944(4)                                                          | 79.593(3)                                            |
| V [ Å <sup>3</sup> ]         | 2330.1(7)                                                          | 1079.20(15)                                          |
| Z                            | 4                                                                  | 2                                                    |
| D(calc) [g/cm <sup>3</sup> ] | 1.567                                                              | 1.853                                                |
| Mu(MoKa) [ /mm]              | 1.048                                                              | 6.647                                                |
| F(000)                       | 1112                                                               | 584                                                  |
| Temperature (K)              | 293(2)                                                             | 293(2)                                               |
| Radiation [Å]                | 0.71073                                                            | 0.71073                                              |
| θ(Min-Max) [°]               | 2.012 - 25.000                                                     | 2.034 - 25.499                                       |
| Dataset (h; k; l)            | -11 to 11, -12 to 12, -29 to 29                                    | -10 to 10, -12 to 12, -15 to 15                      |
| R, wR <sub>2</sub>           | 0.0983 , 0.1925                                                    | 0.0462, 0.1083                                       |
| Goodness of fit(S)           | 1.071                                                              | 1.031                                                |
| CCDC No.                     | 2123838                                                            | 2123839                                              |

**Table S2.** Selected X-ray and calculated bond distances (Å) and angles (°) of **C1** and **C2**

| <b>C1</b>   |           |           | <b>C2</b>  |           |         |
|-------------|-----------|-----------|------------|-----------|---------|
| Bonds(Å)    | X-ray     | Calc.     | Bonds(Å)   | X-ray     | Calc.   |
| Pd1-N2      | 2.065(8)  | 2.028     | Pt1-N2     | 1.971(6)  | 2.021   |
| Pd1-N1      | 2.067(8)  | 2.044     | Pt1-N1     | 2.014(6)  | 2.055   |
| Pd1-C11     | 2.270(3)  | 2.263     | Pt1-O1     | 1.989(5)  | 2.014   |
| Pd1-C12     | 2.290(3)  | 2.294     | Pt1-C11    | 2.329(2)  | 2.381   |
| N2-N3       | 1.363(12) | 1.396     | N2-N3      | 1.394(9)  | 1.352   |
| O1-C15      | 1.348(14) | 1.347     | O1-C15     | 1.296(10) | 1.298   |
| Angles (°)  |           |           |            |           |         |
| C11-Pd1-C12 | 89.33(11) | 89.73039  | O1-Pt1-N1  | 172.4(2)  | 174.348 |
| N2-Pd1-N1   | 81.3(3)   | 80.74118  | O1-Pt1-N2  | 92.5(2)   | 92.304  |
| N2-Pd1-C11  | 95.5(2)   | 95.21670  | O1-Pt1-C11 | 82.41(18) | 83.269  |
| N2-Pd1-C12  | 174.9(2)  | 175.03813 | N2-Pt1-N1  | 91.9(2)   | 90.964  |
| N1-Pd1-C11  | 176.9(2)  | 175.05901 | N2-Pt1-C11 | 170.6(2)  | 173.729 |
| N1-Pd1-C12  | 93.8(2)   | 94.33672  | N1-Pt1-C11 | 94.04(18) | 93.812  |



**Table S3.** Energy and % of composition of some selected molecular orbitals of [Pd(HL)Cl<sub>2</sub>] (C1)

| MO      | Energy | % of composition |    |    |
|---------|--------|------------------|----|----|
|         |        | Pd               | HL | Cl |
| LUMO+5  | -0.58  | 01               | 99 | 0  |
| LUMO+4  | -0.87  | 01               | 99 | 0  |
| LUMO+3  | -1.00  | 04               | 94 | 02 |
| LUMO+2  | -1.54  | 02               | 97 | 01 |
| LUMO+1  | -2.01  | 47               | 23 | 30 |
| LUMO    | -2.85  | 05               | 94 | 01 |
| HOMO    | -5.44  | 01               | 97 | 02 |
| HOMO-1  | -5.90  | 29               | 03 | 68 |
| HOMO-2  | -6.04  | 14               | 13 | 73 |
| HOMO-3  | -6.17  | 28               | 21 | 51 |
| HOMO-4  | -6.20  | 06               | 84 | 10 |
| HOMO-5  | -6.23  | 15               | 04 | 81 |
| HOMO-6  | -6.45  | 84               | 04 | 12 |
| HOMO-7  | -7.14  | 08               | 80 | 12 |
| HOMO-8  | -7.30  | 03               | 89 | 08 |
| HOMO-9  | -7.47  | 03               | 95 | 02 |
| HOMO-10 | -7.57  | 05               | 77 | 18 |

**Table S4.** Energy and composition of some selected molecular orbitals of [Pt(L)Cl] (C2)

| MO      | Energy | % of composition |    |    |
|---------|--------|------------------|----|----|
|         |        | Pt               | L  | Cl |
| LUMO+5  | -0.24  | 03               | 97 | 00 |
| LUMO+4  | -0.47  | 02               | 98 | 00 |
| LUMO+3  | -0.64  | 54               | 34 | 12 |
| LUMO+2  | -0.99  | 03               | 97 | 00 |
| LUMO+1  | -1.42  | 02               | 98 | 00 |
| LUMO    | -2.36  | 04               | 96 | 00 |
| HOMO    | -5.21  | 17               | 72 | 11 |
| HOMO-1  | -5.42  | 15               | 84 | 01 |
| HOMO-2  | -5.98  | 25               | 30 | 45 |
| HOMO-3  | -6.07  | 25               | 08 | 67 |
| HOMO-4  | -6.25  | 86               | 05 | 09 |
| HOMO-5  | -6.70  | 06               | 89 | 05 |
| HOMO-6  | -6.83  | 53               | 46 | 01 |
| HOMO-7  | -7.01  | 01               | 93 | 06 |
| HOMO-8  | -7.20  | 29               | 58 | 13 |
| HOMO-9  | -7.24  | 10               | 63 | 27 |
| HOMO-10 | -7.31  | 07               | 79 | 14 |

**Table S5:** Vertical electronic transition calculated by TDDFT/CPCM method of **C1** and **C2**

| Compd.    | $\lambda$ (nm) | E (eV) | Osc. Strength (f) | Key excitations                          | Character | $\lambda_{\text{expt.}}$ (nm) ( $\epsilon$ , $\text{M}^{-1}\text{cm}^{-1}$ ) |
|-----------|----------------|--------|-------------------|------------------------------------------|-----------|------------------------------------------------------------------------------|
| <b>C1</b> | 533.0          | 2.3261 | 0.3738            | (59%)HOMO→LUMO+1<br>(27%)HOMO→LUMO       | LMCT/ILCT | 496 (13860)                                                                  |
|           | 469.6          | 2.6402 | 0.0289            | (51%)HOMO-4→LUMO+1<br>(37%)HOMO-2→LUMO+1 | LMCT/XMCT | 453 (sh.)                                                                    |
|           | 375.4          | 3.3024 | 0.1254            | (73%)HOMO-3→LUMO                         | MLCT/XLCT |                                                                              |
|           | 346.6          | 3.5775 | 0.1549            | (67%)HOMO→LUMO+2                         | ILCT      | 354 (sh.)                                                                    |
|           | 316.9          | 3.9119 | 0.3436            | (49%)HOMO-9→LUMO                         | ILCT      | 325 (12100)                                                                  |
|           | 269.6          | 4.5982 | 0.1055            | (68%)HOMO→LUMO+5                         | ILCT      | 267 (7478)                                                                   |
| <b>C2</b> | 492.1          | 2.5196 | 0.6759            | (96%)HOMO→LUMO                           | ILCT/MLCT | 505 (16277)                                                                  |
|           | 454.2          | 2.7298 | 0.0352            | (97%)HOMO-1→LUMO                         | ILCT/MLCT | 432 (9778)                                                                   |
|           | 360.7          | 3.4376 | 0.1339            | (59%)HOMO→LUMO+1                         | ILCT/MLCT |                                                                              |
|           | 340.2          | 3.6441 | 0.2962            | (67%)HOMO-5→LUMO                         | ILCT      | 348 (14258)                                                                  |
|           | 277.8          | 4.4636 | 0.1107            | (86%)HOMO-7→LUMO                         | ILCT      | 270 (9068)                                                                   |

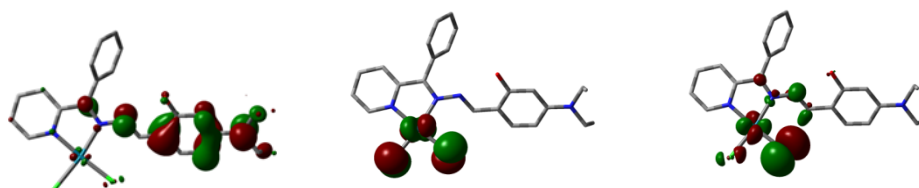

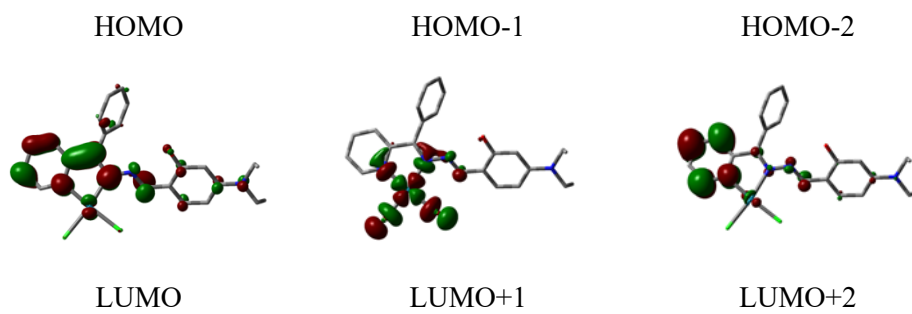

**Figure S12:** Contour plots of some selected molecular orbital of C1

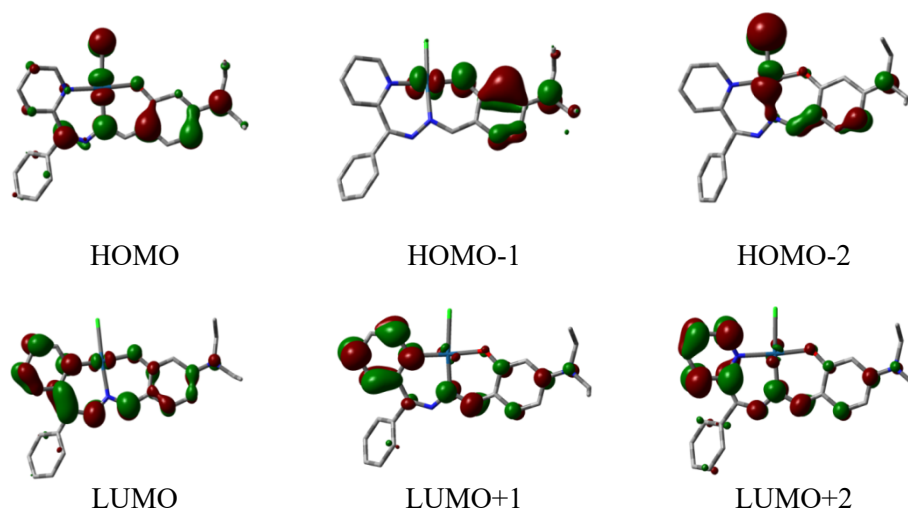

**Figure S13:** Contour plots of some selected molecular orbital of C2
